# Supplementary material
Source: PubMed Central journal article supplement (PMC7964785)
Supplement: 2747_table.pdf [file 2747_table.pdf]

**On-line Table: Complete results for all untreated ocular masses studied with DWI**

| Subject No.<br>(eye) | Diagnosis                           | ADC ( $10^{-3}$<br>mm <sup>2</sup> /s) | Lesion Thickness<br>(cm) | Section<br>Thickness (mm) | ROI Area<br>(cm <sup>2</sup> ) | Artifact Score | Scanner Field<br>Strength |
|----------------------|-------------------------------------|----------------------------------------|--------------------------|---------------------------|--------------------------------|----------------|---------------------------|
| 1 (OD)               | Retinoblastoma                      | 0.65                                   | 1.5                      | 5                         | 0.89                           | Mild           | 3 T                       |
| 2 (OD)               | Retinoblastoma                      | 0.85                                   | 1.2                      | 4                         | 0.81                           | Minimal        | 1.5 T                     |
| 2 (OS)               | Retinoblastoma                      | 1.09                                   | 0.2                      | 4                         | 0.09                           | Minimal        | 1.5 T                     |
| 3 (OS)               | Retinoblastoma                      | 0.74                                   | 1.2                      | 4                         | 0.75                           | Moderate       | 3 T                       |
| 3 (OD)               | Retinoblastoma                      | 1.29                                   | 0.2                      | 4                         | 0.06                           | Moderate       | 3 T                       |
| 4 (OD)               | Retinoblastoma                      | 0.71                                   | 1.0                      | 5                         | 1.38                           | Mild           | 3 T                       |
| 5 (OS)               | Retinoblastoma                      | 0.75                                   | 1.0                      | 5                         | 0.73                           | Moderate       | 1.5 T                     |
| 6 (OD)               | Retinoblastoma                      | 0.72                                   | 1.0                      | 5                         | 0.32                           | Moderate       | 1.5 T                     |
| 6 (OS)               | Retinoblastoma                      | Not seen                               | 0.2                      | 5                         | N/A                            | Moderate       | 1.5 T                     |
| 7 (OD)               | Retinoblastoma                      | 0.66                                   | 0.8                      | 4                         | 0.55                           | Mild           | 1.5 T                     |
| 8 (OS)               | Retinoblastoma                      | 0.68                                   | 0.8                      | 5                         | 0.61                           | Mild           | 1.5 T                     |
| 8 (OD)               | Retinoblastoma                      | 1.51                                   | 0.4                      | 5                         | 0.11                           | Mild           | 1.5 T                     |
| 9 (OD)               | Retinoblastoma                      | 0.92                                   | 0.8                      | 5                         | 0.50                           | Mild           | 1.5 T                     |
| 10 (OS)              | Retinoblastoma                      | 1.13                                   | 0.7                      | 4                         | 0.22                           | Moderate       | 3 T                       |
| 11 (OD)              | Retinoblastoma                      | 0.80                                   | 0.7                      | 4                         | 0.63                           | Mild           | 3 T                       |
| 12 (OS)              | Retinoblastoma                      | 1.49                                   | 0.4                      | 5                         | 0.16                           | Minimal        | 1.5 T                     |
| 13 (OS)              | Highly undifferentiated carcinoma   | 1.21                                   | 0.7                      | 5                         | 0.27                           | No ADC map     | 3 T                       |
| 14 (OS)              | Melanoma                            | 1.29                                   | 1.4                      | 5                         | 1.16                           | Moderate       | 3 T                       |
| 15 (OD)              | Melanoma                            | 1.16                                   | 0.6                      | 4                         | 0.28                           | Mild           | 1.5 T                     |
| 16 (OD)              | Melanoma                            | 0.92                                   | 0.6                      | 5                         | 0.43                           | Moderate       | 1.5 T                     |
| 17 (OD)              | Melanoma                            | 1.23                                   | 0.4                      | 5                         | 0.14                           | Minimal        | 3 T                       |
| 18 (OD)              | Melanoma                            | Not seen                               | 0.3                      | 5                         | N/A                            | Moderate       | 1.5 T                     |
| 19 (OD)              | Melanoma                            | 1.31                                   | 0.3                      | 5                         | 0.38                           | Mild           | 3 T                       |
| 20 (OS)              | Melanoma                            | Not seen                               | 0.2                      | 5                         | N/A                            | Mild           | 1.5 T                     |
| 21 (OS)              | Metastasis (colonic adenocarcinoma) | Not seen                               | 0.3                      | 5                         | N/A                            | Minimal        | 1.5 T                     |
| 22 (OD)              | Lost to follow-up                   | Not seen                               | 0.2                      | 5                         | N/A                            | Minimal        | 3 T                       |

**Note:**—OD indicates right eye; OS, left eye.
